# Supplementary material
Source: PubMed Central journal article supplement (PMC5079772)
Supplement: NIHMS811661-supplement-Supplemental_Digital_Content.pdf [file NIHMS811661-supplement-Supplemental_Digital_Content.pdf]

**Appendix 1. Diagnostic Characteristics of Using a Risk Score Cut-Point of  $\geq 20$  to Identify Women at High Risk of Residual Urinary Incontinence Within 120 Days of Fistula Repair Surgery**

|                                    | True Event | True non-Event |     |
|------------------------------------|------------|----------------|-----|
| Event identified by risk score     | 74         | 97             | 171 |
| Non-event identified by risk score | 17         | 166            | 183 |
|                                    | 91         | 263            | 354 |

|                           |                  |
|---------------------------|------------------|
| Sensitivity               | $74/91 = 81\%$   |
| Specificity               | $166/263 = 63\%$ |
| Positive predictive value | $74/171 = 43\%$  |
| Negative predictive value | $166/183 = 91\%$ |

|                                                                               |                  |
|-------------------------------------------------------------------------------|------------------|
| Proportion of the population identified by the risk score for intervention    | $171/354 = 48\%$ |
| Proportion of the population where the risk score incorrectly predicted event | $97/354 = 27\%$  |
| Proportion of the population where the risk score missed predicting an event  | $17/354 = 5\%$   |

Seidman D and Weber S. Integrating pre-exposure prophylaxis for human immunodeficiency virus prevention into women's health care in the United States. *Obstet Gynecol* 2016; 128.

The authors provided this information as a supplement to their article.

©2016 American College of Obstetricians and Gynecologists.

**Appendix 2. Risk Score for Residual Urinary Incontinence Within 120 Days of Vesicovaginal Fistula Repair Surgery**

**Directions:**

- All women start with a score of 0.
- Check off box correct category for each risk factor.
- Sum the points for all risk factors and record the final risk score at the bottom.

| Risk Factor                       | Check correct box        | Points |
|-----------------------------------|--------------------------|--------|
| <b>Age</b>                        |                          |        |
| ≤ 50                              | <input type="checkbox"/> | 0      |
| >50                               | <input type="checkbox"/> | 17     |
| <b>Number of Prior Surgeries</b>  |                          |        |
| 0                                 | <input type="checkbox"/> | 0      |
| ≥1                                | <input type="checkbox"/> | 12     |
| <b>Goh VVF Size</b>               |                          |        |
| <1.5 cm                           | <input type="checkbox"/> | 0      |
| 1.5 – 3.0 cm                      | <input type="checkbox"/> | 8      |
| > 3.0 cm                          | <input type="checkbox"/> | 7      |
| <b>Circumferential Fistula</b>    |                          |        |
| No                                | <input type="checkbox"/> | 0      |
| Yes                               | <input type="checkbox"/> | 15     |
| <b>Vaginal Scarring</b>           |                          |        |
| None or Mild                      | <input type="checkbox"/> | 0      |
| Moderate or Severe or Obliterated | <input type="checkbox"/> | 7      |
| <b>Urethral Length</b>            |                          |        |
| > 1.5 cm                          | <input type="checkbox"/> | 0      |
| ≤1.5 cm                           | <input type="checkbox"/> | 6      |

Sum points for all checked boxes

RISK SCORE

Seidman D and Weber S. Integrating pre-exposure prophylaxis for human immunodeficiency virus prevention into women’s health care in the United States. *Obstet Gynecol* 2016; 128.

The authors provided this information as a supplement to their article.

©2016 American College of Obstetricians and Gynecologists.
